## RESEARCH ARTICLE

## Identifying factors associated with instructor implementation of three-dimensional assessment in undergraduate biology courses

Crystal Uminski<sup>1,2</sup>, Brian A. Couch<sup>1\*</sup>

**1** School of Biological Sciences, University of Nebraska, Lincoln, Nebraska, United States of America,  
**2** Thomas H. Gosnell School of Life Sciences, Rochester Institute of Technology, Rochester, New York, United States of America

\* [bcouch2@unl.edu](mailto:bcouch2@unl.edu)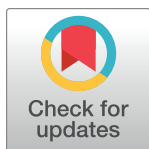

## Abstract

Recent national calls to transform undergraduate science education have centered on engaging students in scientific practices as a means to help them develop deeper insights into science. The three-dimensional framework for science education encapsulates the goals of these national calls by recommending that instructors integrate scientific practices, crosscutting concepts, and disciplinary core ideas throughout their courses. Prior research has found that introductory undergraduate biology exams contain few three-dimensional items suggesting that instructors likely face barriers in meeting the goals of national calls. To better understand these putative challenges, we explored factors potentially associated with three-dimensional alignment. Our generalized linear mixed model indicated that instructors who used three-dimensional items on their exams were more likely to use Bloom's Taxonomy when designing their exams and were more likely to write these items using a constructed-response format. We also found that professional development opportunities did not necessarily change the likelihood an instructor would employ three-dimensional items. We previously identified that few items in our sample fully aligned to scientific practices, making scientific practices the limiting dimension for three-dimensional alignment. Our subsequent analysis here revealed that most biology instructors had exam items that were at least partially aligned to scientific practices. Based on our results, we highlight the significant time and resources that instructors likely need to write and grade constructed-response assessments, suggest that instructors build on items that are mostly aligned to scientific practices to increase their three-dimensional alignment, and propose ways that professional development programs and communities might further support instructors in meeting national calls.

## OPEN ACCESS

**Citation:** Uminski C, Couch BA (2024) Identifying factors associated with instructor implementation of three-dimensional assessment in undergraduate biology courses. PLoS ONE 19(10): e0312252. <https://doi.org/10.1371/journal.pone.0312252>

**Editor:** Gokhan Hacasalihoglu, Florida Agricultural and Mechanical University, UNITED STATES OF AMERICA

**Received:** June 26, 2024

**Accepted:** October 3, 2024

**Published:** October 22, 2024

**Copyright:** © 2024 Uminski, Couch. This is an open access article distributed under the terms of the [Creative Commons Attribution License](https://creativecommons.org/licenses/by/4.0/), which permits unrestricted use, distribution, and reproduction in any medium, provided the original author and source are credited.

**Data Availability Statement:** Per the PLOS ONE policy on Data Availability, we have included the de-identified data necessary to reproduce the generalized linear mixed model and the summary statistics presented in our results ([Supporting information 10](#)).

**Funding:** This material is based upon work supported by the National Science Foundation (NSF) Graduate Research Fellowship (DGE-1610400) and Improving Undergraduate STEM Education Grant (DUE-2044243). Any opinions,

## Introduction

For the past several decades, the landscape of science education has been defined by national calls for teaching that engages students in scientific processes to help them better understand

findings, and conclusions or recommendations expressed in this material are those of the authors and do not necessarily reflect the views of the NSF. The funders had no role in study design, data collection and analysis, decision to publish, or preparation of the manuscript.

**Competing interests:** The authors have declared that no competing interests exist.

science [1–12]. These calls have spotlighted particular aspects of science education, such as scientific literacy [1], inquiry [9, 13], career preparation [5, 8, 11], and integrating scientific concepts and competencies [4, 12]. Within the K-12 education system, public school districts are often held accountable for achieving the goals outlined in these calls through standardized assessments, accountability-based policies, and federal intervention programs [14, 15]; however, postsecondary education lacks equivalent structures to monitor progress [16]. Thus, the extent to which national calls have percolated through the undergraduate biology education system remains an area of active research.

## Gauging implementation of three-dimensional learning through course exams

Our research focuses on characterizing the extent to which undergraduate biology courses reflect the particular national call to center three-dimensional learning as the primary basis for science education [12]. The three-dimensional framework emerged from a robust synthesis of educational research [3, 9, 17–20] and builds on evidence that students develop deep understanding of science when their learning integrates three major dimensions: scientific practices (i.e., skills and processes used by scientists to establish, extend, and refine scientific knowledge), crosscutting concepts (i.e., concepts that unify the study of science through common application across disciplines), and disciplinary core ideas (i.e., a limited number of foundational concepts central to each science discipline; Fig 1). These dimensions encourage students to comprehend the nature of scientific knowledge generation via scientific practices, illuminate the unifying concepts that cut across science disciplines, and equip students with foundational core knowledge that enable subsequent acquisition of additional disciplinary content knowledge [12].

The three-dimensional framework specifies that curriculum, instruction, and assessment should enable students to actively engage in scientific practices and the application of crosscutting concepts in ways that deepen their understanding of disciplinary core ideas [12]. By focusing on deep understanding of a small number of disciplinary core ideas, three-dimensional learning may help students grasp the logic and universality of science rather than perceive science as a collection of disparate facts [12]. While the three-dimensional framework was developed for K-12 science education and is widely used in state-based science education standards [6, 22], this framework also translates to the undergraduate level and readily applies to curriculum, instruction, and assessment in the introductory-level courses that follow high school science [21, 23–26].

A recent study provided insights into faculty motivation to implement three-dimensional learning at the undergraduate level [27]. This study interviewed ( $n = 8$ ) and surveyed ( $n = 33$ ) faculty who participated in a two-year program aimed at helping them incorporate three-dimensional instruction into their large-enrollment science and math courses. Participants expressed strong value toward three-dimensional learning, both as an effective organizational framework and as a way to engage students in thinking like scientists. Conversely, participants reported challenges associated with understanding the framework, covering adequate content, and coordinating teaching with other instructors. While this work characterized the motivations of instructors who self-selected into a professional development program, these researchers also highlighted the need to study a broader array of instructors as well as to relate self-reported personal and contextual factors with measures of three-dimensional learning implementation.

The three-dimensional framework scaffolds science curriculum, instruction, and assessment to align with national priorities, but here we narrow our focus to exams as a tractable

| Scientific Practice                                              | Crosscutting Concept                               | Biology Core Idea                                 |
|------------------------------------------------------------------|----------------------------------------------------|---------------------------------------------------|
| Asking questions                                                 | Patterns                                           | Evolution                                         |
| Developing and using models                                      | Cause and effect: Mechanism and explanation        | Information flow, exchange, and storage           |
| Planning investigations                                          | Scale                                              | Structure and function                            |
| Analyzing and interpreting data                                  | Proportion and quantity                            | Pathways and transformations of energy and matter |
| Using mathematics and computational thinking                     | Systems and system models                          | Systems                                           |
| Constructing explanations and engaging in argument from evidence | Energy and matter: Flows, cycles, and conservation |                                                   |
| Evaluating information                                           | Structure and function                             |                                                   |
|                                                                  | Stability and change                               |                                                   |

**Fig 1. Three-dimensional framework adapted for undergraduate-level biology.** Three-dimensional framework adapted from the Three-Dimensional Learning Assessment Protocol (3D-LAP) [21]. See the Methods for additional details on the adaptation of the three-dimensional framework for undergraduate biology.

<https://doi.org/10.1371/journal.pone.0312252.g001>

means to gauge three-dimensional implementation in a course. Exams are common summative assessment structures that tend to carry significant weight in undergraduate science courses [28–32]. Since what is included on exams inherently reflects what instructors intend for students to learn, exams can be used to gauge the extent to which certain content and skills have been targeted as part of the associated curriculum and instruction [10, 33, 34]. Thus, exams can provide a lens for drawing inferences about the dissemination of national calls.

The approach of using assessments as a proxy for incorporation of the three-dimensional framework has been used in several studies [25, 35–38]. These studies applied the Three-Dimensional Learning Assessment Protocol (3D-LAP) [21] as a tool for characterizing the three-dimensional alignment of assessment items (i.e., exam questions). A common finding across these studies was that the majority of items in undergraduate science courses were not three-dimensionally aligned (see Fig 2 for an example item that is aligned to all three dimensions and S1 Table for a description of how we coded three-dimensional alignment). We previously found that only 5% of the items in our nationwide sample of lower-division (100- and 200-level) undergraduate biology exams were three-dimensional—a phenomenon largely

**Three-dimensional alignment:****Scientific Practice:** Developing and Using Models**Crosscutting Concept:** Structure and Function**Core Idea:** Structure and Function

A student created this drawing to represent a DNA replication fork.

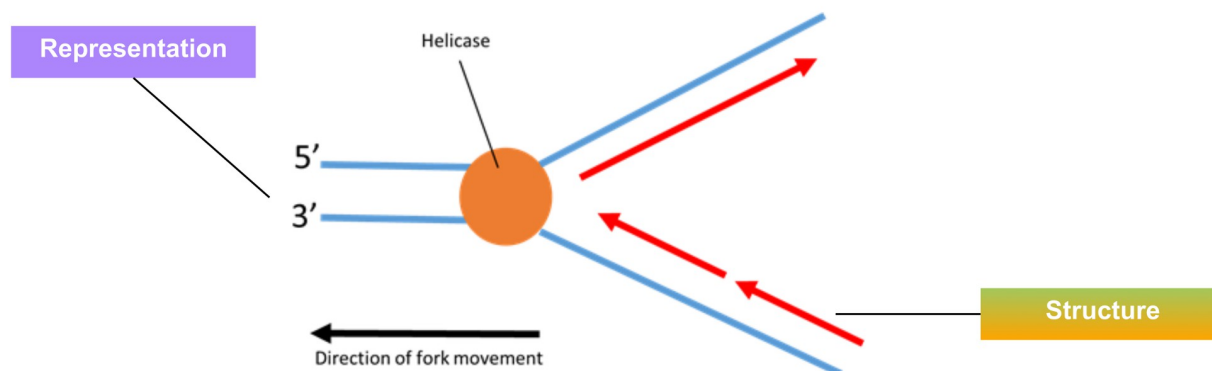**Part A.**

Which of the following modifications to the student's model would make a more accurate representation of a DNA replication fork?

- a) Swapping the 5' and 3' labels
- b) Changing the enzyme to polymerase
- c) Reversing the arrow indicating direction of fork movement
- d) Reversing the arrows of the leading and lagging strands

**Part B.**

Which of the following best explains why the modification you selected would be a more accurate representation of a DNA replication fork?

- a) DNA polymerase can add nucleotides to both 5' and 3' ends of the leading and lagging DNA strands.
- b) The direction of the leading and lagging strand synthesis results from DNA polymerase only adding nucleotides to the 3' ends of DNA strands.
- c) Leading and lagging DNA strands are synthesized continuously in a 5' to 3' direction but in the opposite direction within the replication fork.
- d) DNA polymerase controls both the direction of fork movement and the addition of nucleotides to the ends of leading and lagging DNA strands.

**Fig 2. Example item coded for alignment to the three-dimensional framework.** This three-dimensional example item is annotated for alignment to the 3D-LAP [21] criteria for the scientific practice “Developing and Using Models,” the 3D-LAP criteria for the crosscutting concept “Structure and Function,” and molecular-scale concepts from the BioCore Guide [39] criteria for the core concept “Structure and Function.” See S1 Table for the full description of how this item aligns to criteria for each dimension. See S2 File for additional items coded for alignment to the three-dimensional framework.

<https://doi.org/10.1371/journal.pone.0312252.g002>

driven by the lack of incorporation of scientific practices [35]. Scientific practices occurred in only 7% of biology exam items, as compared to crosscutting concepts and core ideas, which were present in approximately half and two-thirds of items, respectively. The low frequency of three-dimensional items raises questions about what helps or hinders implementation of the three-dimensional framework in undergraduate science [25].

### Conceptual framework for understanding how national calls relate to local practices

Undergraduate biology education is a complex system that spans federal agencies, professional organizations, undergraduate institutions, science departments, and biology instructors. To understand how the parts of this system interact and affect local practice in biology courses, we expand upon an existing conceptual framework that describes three contextual levels of education systems that mediate implementation of pedagogy and assessment [40, 41]. These three levels—*macro*, *meso*, and *micro*—are characterized by the span and reach of the factors associated at each level, ranging from discourse, decisions, policies, and trends at national, institutional, and instructional levels, respectively (Fig 3). Together, factors at the three levels directly or indirectly interact to influence a pedagogical outcome—in our case, three-dimensional alignment of the items on biology exams. Our conceptual framework highlights specific factors that exist at each level of the undergraduate biology education system and their potential to affect pedagogical practices particularly related to the content assessed on biology exams.

Within our conceptual framework, the *macro* level represents national-level discourse about science education that may influence assessment practices in undergraduate biology. This discourse typically occurs in the form of published documents from federal agencies and professional organizations that summarize recommendations from education researchers, issue calls to action, and present relevant educational frameworks. We highlight three particular publications for their potential to influence biology assessment practices. *A Framework for K-12 Science Education* [12] presents the three-dimensional framework that was adapted for use at the undergraduate level in the form of the Three-Dimensional Learning Assessment Protocol [21]. *Vision and Change* [4] is a national initiative aimed at reforming undergraduate biology education by emphasizing deep understanding of biology core concepts and promoting scientific reasoning through core competencies. *A Taxonomy of Educational Objectives* (i.e., Bloom's Taxonomy) [42] is a commonly-used educational framework describing types of cognitive skills students have the potential to engage in while completing a task. By itself, Bloom's Taxonomy is decontextualized and as such, the distinction between its cognitive skills can be unclear [43], but this framework has been adapted for use in undergraduate biology research and professional development [44–47]. Together, these three documents and their relevant adaptations represent factors that can establish norms, values, and goals for biology education.

The *meso* level aligns with institutional and departmental contexts. Factors at the *meso* level, such as characteristics of the institutional environment and supports provided by the institution, are situated outside of the immediate course context but can still affect teaching practices [40, 41]. Characteristics of the institutional environment can include institution type, which reflects an institution's function, mission, research output, and degree types [48]. Supports provided by institutions and departments may include offering professional development opportunities [49, 50], incorporating teaching assistants in high-enrollment courses [25, 51], or hiring faculty with discipline-based education research (DBER) experience in the department [52, 53]. The pedagogical decisions instructors make about their courses may be



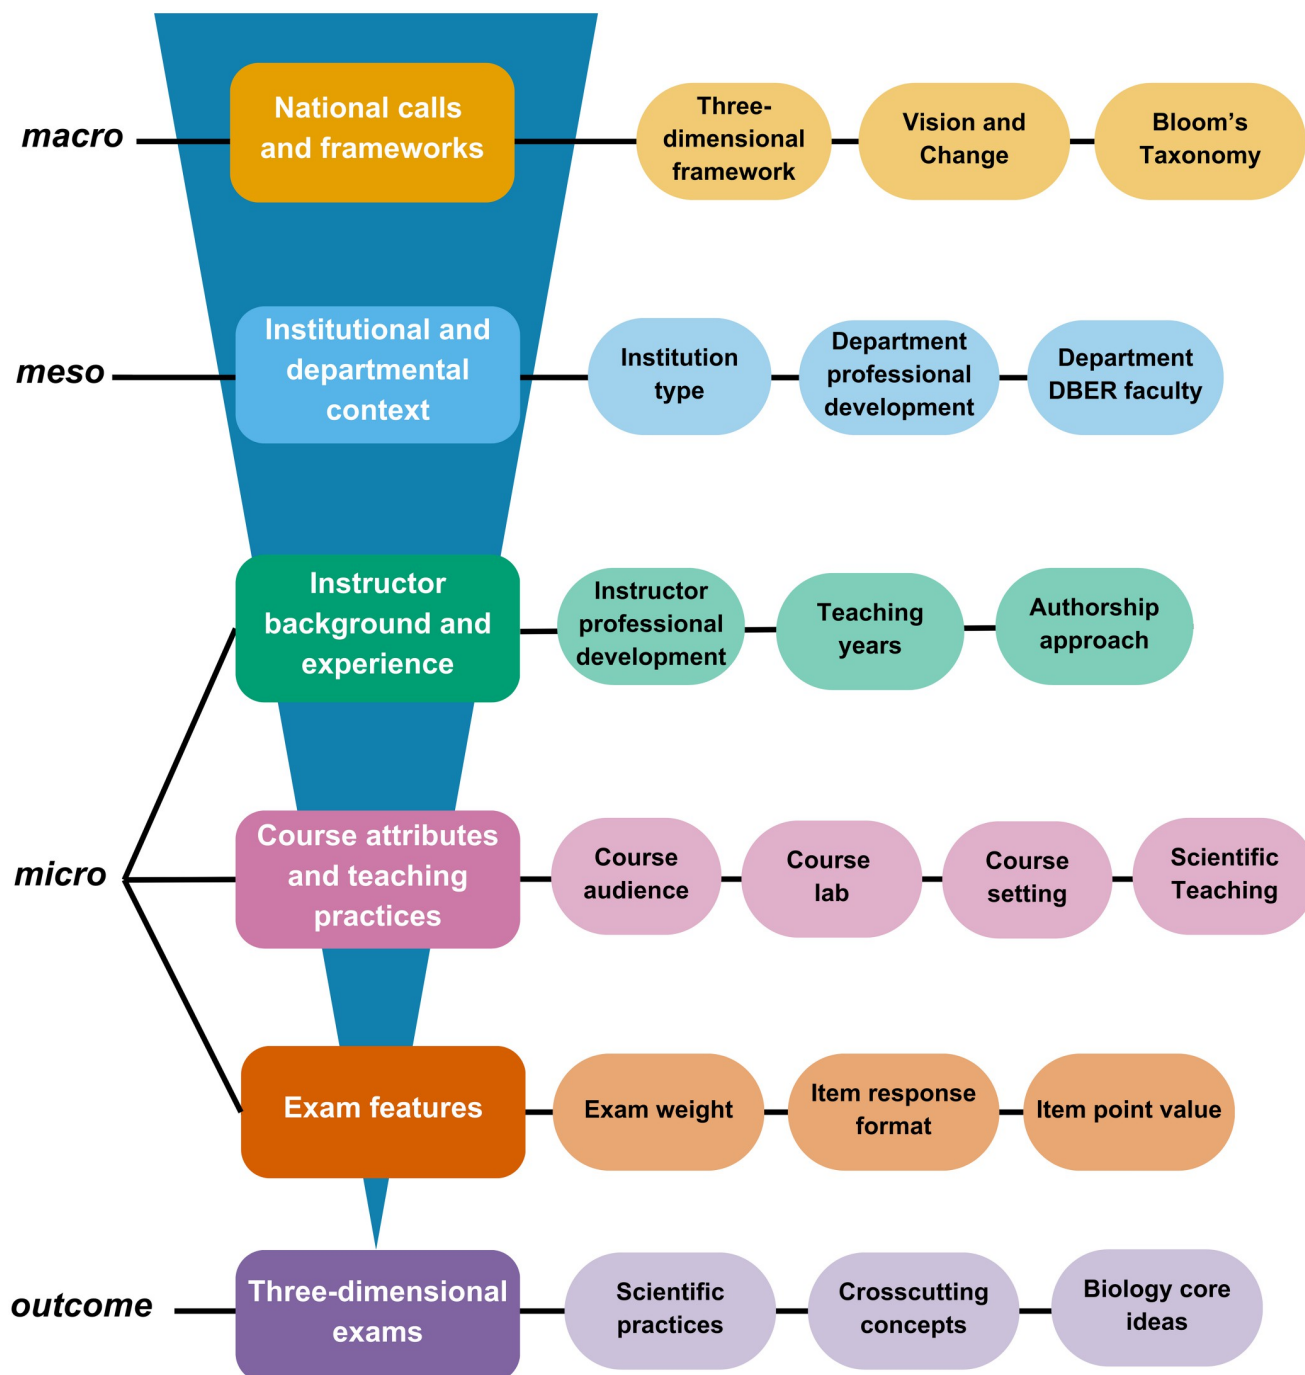

**Fig 3. Conceptual framework of the levels of the undergraduate biology education that can influence three-dimensional assessment.** We operationalize each of the levels of the education system in boxes on the left. Factors within each level are in circles to the right.

<https://doi.org/10.1371/journal.pone.0312252.g003>

linked to whether their institutions and departments provide supports and create communities that enhance the capacity to implement instruction in line with national calls [54–57].

In our framework, the *micro* level reflects the immediate context of undergraduate biology courses. This *micro* level includes the characteristics, experiences, and practices of instructors,

factors related to the student population, and the physical classroom environment [40]. Many studies in biology education focus on factors at the *micro* level, such as investigations into the effects of instructor pedagogical background [58, 59], teaching methods [60, 61], class size [62, 63], student majors [64], paired lecture and lab courses [65], and exam item format [31, 66].

## Research aims

Building on our conceptual framework, our work here uses a nationwide survey and exam collection to identify factors associated with the three-dimensional alignment of introductory undergraduate biology exams on a broad scale. We join others in recognizing the challenges associated with implementing three-dimensional assessments, in particular with eliciting explicit evidence of scientific practices [21, 27, 67–69]. Our first aim for this research is to explore potential variables associated with three-dimensional alignment from across different levels of the education system. Through this analysis, we seek to better understand what barriers may exist to three-dimensional assessment and to highlight areas in which undergraduate biology instructors may benefit from additional support. Our second aim for this research is to more fully delineate the occurrence of scientific practices in biology exams. The goal of this analysis is to achieve a higher resolution of biology exam content and to highlight where instructors may target their efforts to engage students in three-dimensional assessment.

## Methods

### Survey administration and content

The current study expands on the methods and data collection reported in our previous study [35]. Briefly, we developed an online survey through Qualtrics to collect course artifacts (e.g., a course syllabus, a summative exam, the exam answer key) along with institutional, course, and demographic information from instructors of lower-division undergraduate biology courses (i.e., 100- and 200-level courses and their equivalents). Our final dataset contained responses from 111 lower-division biology instructors at 100 unique undergraduate institutions across the United States. Our sample included broad representation from each undergraduate institution type as defined by Carnegie classifications (S2 Table) and from instructors across career stages (S3 Table). We asked instructors to complete the survey with regard to a lecture-based 100- or 200-level biology course for which they were an instructor of record. Most courses in this study were introductory-level (80%), and the remaining courses spanned a variety of lower-division biology topics including anatomy and physiology, environmental science, and microbiology (S4 Table). We relied on self-reports from survey participants that the non-introductory courses in this sample were taught as lower-division courses in their respective institutional contexts.

We also asked instructors to self-report on a series of factors potentially related to the structure and design of their exams. These factors spanned a range of levels, including connections to national calls and frameworks, institutional and departmental context, instructor background and experiences, course attributes, and exam features (Table 1). The survey items and additional descriptions are in S1 File. A descriptive summary of instructor responses to these questions is in S1 Fig. This research was classified as exempt from human-subjects review by the University of Nebraska–Lincoln (protocol 21082). Informed consent was collected electronically from participants at the start of the survey.

### Coding for item content

Our assessment dataset contained 111 exams consisting of 4337 items (i.e., test questions). We used the point values and numbering schemes specified by the instructor to determine the

**Table 1. Descriptions of factors potentially related to course exam design.**

| <b>Macro Level: Connections to national calls and frameworks</b> |                                                                                                                                                                                                                                                                                                                                                                                      |
|------------------------------------------------------------------|--------------------------------------------------------------------------------------------------------------------------------------------------------------------------------------------------------------------------------------------------------------------------------------------------------------------------------------------------------------------------------------|
| Use of 3D-LAP                                                    | Self-reported data about the degree to which instructors used the Three-Dimensional Learning Assessment Protocol (3D-LAP) [21] when writing their exams. Reported using a Likert scale ranging from Never to Almost Always.                                                                                                                                                          |
| Use of Vision and Change                                         | Self-reported data about the degree to which instructors used <i>Vision and Change</i> [4] when writing their exams. Reported using a Likert scale ranging from Never to Almost Always.                                                                                                                                                                                              |
| Use of Bloom's Taxonomy                                          | Self-reported data about the degree to which instructors used Bloom's Taxonomy [42] when writing their exams. Reported using a Likert scale ranging from Never to Almost Always.                                                                                                                                                                                                     |
| <b>Meso Level: Institutional and departmental context</b>        |                                                                                                                                                                                                                                                                                                                                                                                      |
| Institution type                                                 | Institutions were classified as Associate's, Baccalaureate, Master's, or Doctoral based on the 2018 Carnegie classifications [48].                                                                                                                                                                                                                                                   |
| Department professional development                              | Self-reported data about whether the instructor's department has allocated resources (e.g., time or money) for faculty professional development.                                                                                                                                                                                                                                     |
| Department DBER faculty                                          | Self-reported data about whether the instructor's department contains any faculty who identify as discipline-based education researchers (including the instructor themselves, if applicable).                                                                                                                                                                                       |
| <b>Micro Level: Instructor background and experiences</b>        |                                                                                                                                                                                                                                                                                                                                                                                      |
| Instructor professional development                              | Self-reported data about the extent to which the instructor completed professional development about assessment (reported in 4-hour time increments).                                                                                                                                                                                                                                |
| Teaching years                                                   | Self-reported data about the number of years of teaching experience (reported in 5-year time increments).                                                                                                                                                                                                                                                                            |
| Authorship approach                                              | Self-reported data about whether the instructor wrote original exam items, sourced the exam items from other materials, or had a combination of both original and sourced items.                                                                                                                                                                                                     |
| <b>Micro Level: Course attributes and teaching practices</b>     |                                                                                                                                                                                                                                                                                                                                                                                      |
| Course audience                                                  | Self-reported data about whether the course was intended for students with STEM majors, non-STEM majors, or both STEM and non-STEM majors.                                                                                                                                                                                                                                           |
| Course lab                                                       | Self-reported data about whether the course had a required lab component.                                                                                                                                                                                                                                                                                                            |
| Course setting                                                   | Self-reported data about whether the course was taught in-person, online, online (because of the COVID-19 pandemic but had previously been taught in-person), or hybrid (both in-person and online).                                                                                                                                                                                 |
| Scientific Teaching                                              | Self-reported data about the degree to which instructional practices aligned with Scientific Teaching principles related to active learning, data analysis and interpretation, and experimental design. Data was collected using subscales of the Measurement Instrument for Scientific Teaching (MIST) [61]. See <a href="#">S1 File</a> for description of MIST score calculation. |
| <b>Micro Level: Exam features</b>                                |                                                                                                                                                                                                                                                                                                                                                                                      |
| Exam weight                                                      | The percentage of the final course grade that was attributed to summative exams (including midterm and final exams if applicable). Data was collected from course syllabus documents.                                                                                                                                                                                                |
| Item response format                                             | Individual exam items were classified as selected-response or constructed-response based on whether students were provided a list of options to pick from or had to generate a response to the item. See <a href="#">S5 Table</a> for additional details.                                                                                                                            |
| Item point value                                                 | The point value of individual exam items was collected from either the exam document, the associated answer key, or instructor-provided text description of their exam. Item point values were normalized across each instructor's exam by dividing the point value of the item by the total number of points on the exam and multiplying by 100.                                    |

<https://doi.org/10.1371/journal.pone.0312252.t001>

boundaries of individual items. In line with prior recommendations [21], we coded items that shared a common stem and/or used a sub-part numbering scheme (e.g., 2a, 2b, 2c) as a single clustered item. As exams use different grading point schemes across courses, we calculated a normalized item point value by dividing individual item point value by the total number of



points on the exam and multiplying by 100. Our coding process included an initial coder training period, coding of the full dataset, and calculation of interrater reliability based on dual coding 10% of the dataset. Full details on coding procedures and interrater reliability are in our prior report [35].

We coded individual exam item content using existing protocols. Briefly, we coded scientific practices and crosscutting concepts based on the Three-Dimensional Learning Assessment Protocol (3D-LAP) [21]. We coded core ideas from the *Vision and Change* core concepts [4], as delineated in the BioCore Guide [39]. Example items meeting all three dimensions (i.e., scientific practices, crosscutting concepts, and disciplinary core ideas) are reproduced in [S2 File](#). We coded Bloom's Taxonomy levels [42, 70] using the Bloom's Dichotomous Key [45]. We coded the highest Bloom's value the item was capable of eliciting and then subsequently categorized "remember," "understand," and "apply" as lower-order cognitive skills (LOCS) and "analyze," "evaluate," and "create" as higher-order cognitive skills (HOCS). We achieved >80% agreement for coding the presence or absence of each dimension (i.e., agreement that there was or was not any scientific practice, crosscutting concept, or core idea present in the item). We had 95% agreement for coding items as LOCS versus HOCS.

### Coding for item format

We coded 13 different item formats that were classified as either constructed-response (i.e., open-ended) or selected-response (i.e., closed-ended) item types. We considered constructed-response items those that required students to generate an original response and selected-response items those that asked students to choose from a provided set of responses. Constructed-response item types included fill-in-the-blank, short answer, and essay, which were determined by the relative length of the expected student response (a single word or phrase, up to a paragraph, or multiple paragraphs, respectively). Constructed-response items also included clusters (a series of constructed-response items that shared a common stimulus or prompt), math manipulation (involving an algorithmic calculation), modeling (creating or modifying a model), and discipline-specific items (procedures, algorithms, or processes specific to biological sciences, such as manipulating genetic sequences or completing Punnett squares). Selected-response items included multiple-choice, multiple-select (a multiple-choice item in which more than one option is selected), true-false, multiple-true-false, matching, and reorder. Full descriptions of the item types coded are in [S5 Table](#). We achieved 99% interrater agreement at the level of constructed-response versus selected-response classification, and >90% agreement for coding of each individual item format.

### Coding for partial alignment to scientific practices

The 3D-LAP coding protocol [21] provides a set of 2–4 criteria statements for each scientific practice. In the original 3D-LAP protocol, scientific practices are coded as a binary variable based on whether the item meets all the criteria statements for a given scientific practice. There is value in this binary approach to scientific practices, but we found that few instructors consistently meet the standards for full alignment. To explore underlying variation, we recoded our data on an ordinal scale based on the number of scientific practice criteria statements to which each item aligned. This scale included the categories: not aligned, partially aligned, mostly aligned, or fully aligned to a scientific practice. Briefly, items that were not aligned did not meet any of the criteria statements for a scientific practice. Items that were partially aligned met surface-level criteria, such as including a real-world biological phenomenon described in text or presented as a visual model. Items that were mostly aligned met the majority of the scientific practice criteria but lacked an explicit prompt for students to provide

reasoning or justification for their thought processes. Items that were fully aligned met each criteria statement for the scientific practice. When items met criteria for multiple scientific practices, we coded the item at the highest level of alignment for each practice and conducted analysis based on the highest level across all the practices present within the item. See [Fig 2](#) and [S2 File](#) for example items meeting each level of alignment to scientific practices. For further details on the translation of the 3D-LAP protocol into the partial alignment coding scheme, see [S3 File](#). We achieved >80% agreement for the coding of each scientific practice (i.e., agreement about the degree of alignment to the criteria statements for each of the scientific practices).

## Statistical analysis and data availability

Following original recommendations [21], we treated three-dimensional item alignment as binary (i.e., items were either three-dimensional or not three-dimensional); thus, when three-dimensional alignment was the response variable, we used a generalized linear mixed model (GLMM) with a logit link. As we had multiple items per instructor in the sample, we included instructor as a random effect. We used forward stepwise model selection procedures based on Akaike Information Criterion (AIC) to determine the subset of variables that best explained variability in three-dimensional alignment while avoiding overfitting. Variables were individually tested for retention in the model and were only retained if the new model had an AIC value more than two units lower than the prior model [71]. We conducted statistical analysis with R statistical software [v 4.2.3] [72] using tidyverse [73] for data processing and figure generation. We used lme4 [74] for our GLMM, car [75] for calculating a type-II ANOVA for the GLMM, and multcomp [76] for Tukey post hoc comparison. De-identified data of the predictor variables retained in the GLMM and the data underlying summary statistics presented in the results are in [S1 Data](#).

## Results

### Identifying factors associated with three-dimensional exams

Three-dimensional items engage students with a scientific practice, crosscutting concept, and core idea. We used a generalized linear mixed-effects model to identify the most salient factors associated with an item's alignment to the three-dimensional framework. Model selection retained four predictor variables: instructor use of Bloom's Taxonomy, institution type, item response format, and item point value ([Table 2](#)). Here, we provide additional characterization of how each of these variables relates to an instructor's use of three-dimensional items on their exam.

**Table 2. Analysis of deviance (Type-II Wald test) for a generalized linear mixed model with binomial logit link predicting whether an item was likely to be three-dimensionally aligned.**

| Fixed effects           | $\chi^2$ | df | p       |
|-------------------------|----------|----|---------|
| Use of Bloom's Taxonomy | 5.1      | 1  | 0.02    |
| Institution type        | 10.4     | 3  | 0.02    |
| Item response format    | 118.8    | 1  | < 0.001 |
| Item point value        | 7.3      | 1  | 0.007   |

Model: Three-dimensional alignment ~ Item point value + Item response format + Institution type + Use of Bloom's Taxonomy + (1|instructor), family = binomial(link = logit). Model  $R^2 = 0.496$ .

See [S6 Table](#) for a Tukey post hoc comparison of institution types.

<https://doi.org/10.1371/journal.pone.0312252.t002>

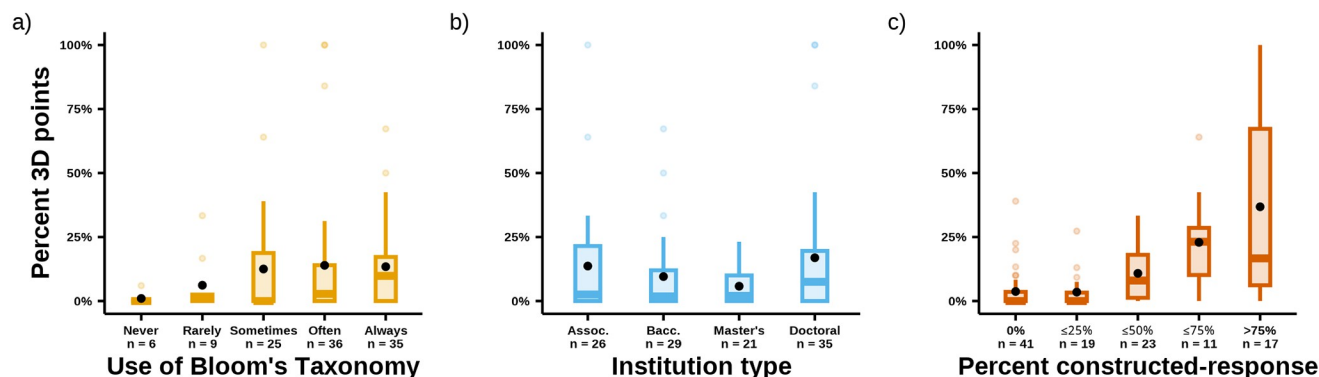

**Fig 4. Percent of three-dimensional exam points based on instructors' use of Bloom's Taxonomy, institution type, and use of constructed-response items.** Boxes represent the interquartile range (IQR) and whiskers represent 1.5x IQR. The solid bar represents the median value. The black dot represents the mean. a) Instructor responses to a Likert-scale survey item on reported use of Bloom's Taxonomy when designing exams. Note that the Likert scale response "Almost Always" was abbreviated to "Always" in this figure. b) Institution types were based on Carnegie classifications. c) The point value of constructed-response items on each instructor's exam were summed and divided by the total point value of all the exam items. The bin titles are abbreviated, and the values included in each bin are exclusive (e.g., the  $\leq 75\%$  bin includes values  $> 50\%$ ).

<https://doi.org/10.1371/journal.pone.0312252.g004>

Instructors who reported higher use of Bloom's Taxonomy when writing their exams had a higher likelihood of using three-dimensional items. While instructors who reported minimal use of Bloom's Taxonomy had an average of 1–6% of their test points from three-dimensional items, instructors who used Bloom's Taxonomy more frequently had 13–14% of their test points from three-dimensional items (Fig 4a). In line with this result, we further found that three-dimensional items were more likely to assess higher-order cognitive skills ( $\chi^2 = 1121.1$ ,  $df = 1$ ,  $p < 0.001$ ). Approximately 68% of three-dimensional items ( $n = 159$  of 236) assessed a higher-order cognitive skill compared to only 5% of non-three-dimensional items ( $n = 205$  of 4101).

For institution type, we observed that the average percent of test points from three-dimensional items ranged from 6–17% (Fig 4b). Since institution type is a nominal variable, we conducted post hoc pairwise comparisons between all institution types (S6 Table). The only difference came between Doctoral and Baccalaureate institutions, with the former being slightly more associated with the use of three-dimensional items.

From the initial model, item response format stood out as the variable most closely associated with an item being three-dimensional. Exams with zero or very few constructed-response items also had a very low percent of three-dimensional points (3–4%; Fig 4c). Conversely, increased use of constructed-response items coincided with a greater percent of three-dimensional points. This culminated in exams with mostly constructed-response items (i.e.,  $> 75\%$ ,  $n = 17$ ) having an average of 37% of the points from three-dimensional items.

Further analysis of the item pool helped reveal patterns in how instructors tended to use certain item formats (Fig 5, S7 Table). On the whole, selected-response items generally did not meet the three-dimensional criteria (2.8%), although it should be noted that we observed three-dimensional selected-response items ( $n = 106$  in the item pool) comprised 45% of the total number of three-dimensional items in our sample ( $n = 236$  in the item pool; see S2 File for examples of three-dimensional items). The low incidence of three-dimensional items was relatively consistent across specific selected-response item types (e.g., multiple-choice, matching, true-false). Conversely, constructed-response items had a much higher likelihood of being three-dimensional (23.0%). Cluster (46.1%), essay (44.4%), short answer (24.7%), and model (17.1%) formats were all amenable to being three-dimensional. While fill-in-the-blank was a

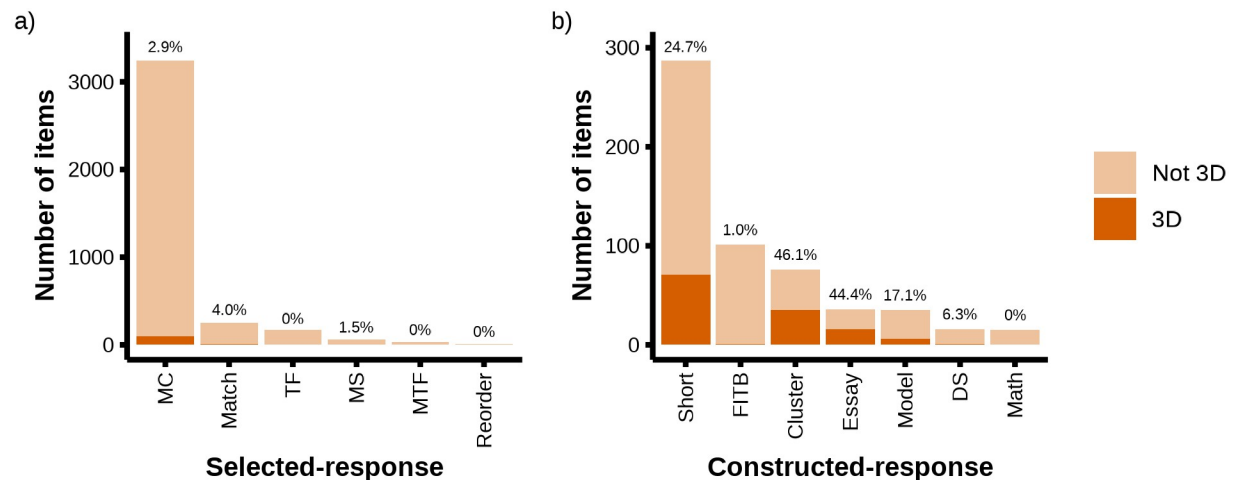

**Fig 5. Extent to which different item types target three-dimensional learning.** The percent of three-dimensional items for each item type is printed on top of each bar. a) Percent of three-dimensional selected-response items. Abbreviations: MC = multiple-choice; TF = true-false; MS = multiple-select; MTF = multiple-true-false. b) Percent of three-dimensional constructed-response items. Abbreviations: Short = short answer; FITB = fill-in-the-blank; DS = discipline-specific; Math = math manipulation.

<https://doi.org/10.1371/journal.pone.0312252.g005>

common constructed-response format, only a low percent of these items targeted three-dimensions (1.0%), on par with values for selected-response formats.

Finally, three-dimensional items tended to be worth more points on exams. When normalized for the point values across an entire exam, three-dimensional items were worth  $5.70 \pm 0.41$  SEM points on average compared to only  $2.35 \pm 0.03$  SEM points for non-three-dimensional items.

While it is important to consider the factors that are associated with three-dimensional items, it is also important to point out variables that did not contribute to the model. Instructor use of *Vision and Change* and the 3D-LAP frameworks were both excluded. We saw no effect of department support for professional development or departments containing faculty with discipline-based education research expertise. Our model similarly excluded all factors related to instructor background and experiences (i.e., teaching years, instructor professional development, and exam authorship approach) as well as broader course attributes and teaching practices (i.e., course audience, course lab, course setting, and Scientific Teaching). Exam weight in the overall grade had no connection to the likelihood of an item being three-dimensional.

### Partial alignment to scientific practices

We previously found that low three-dimensional occurrence was driven by the small number of items fully meeting the 3D-LAP criteria for scientific practices [35]. We subsequently hypothesized that the low incidence of scientific practices could have resulted from the 3D-LAP's stringent criteria. To explore this hypothesis, we analyzed our data with respect to partial alignment to the scientific practice criteria statements (Fig 6). We found that even when accounting for partial alignment, most items (61%) still did not meet any of the criteria for scientific practices (Fig 6a). Approximately 19% of items were partially aligned to a scientific practice because they met surface-level criteria by including an event, observation, or observable biological phenomenon. About 12% of items were mostly aligned to a scientific practice but failed to meet full alignment because they did not ask students to explicitly convey reasoning or justification, whereas 7% of items met the fully aligned criteria.

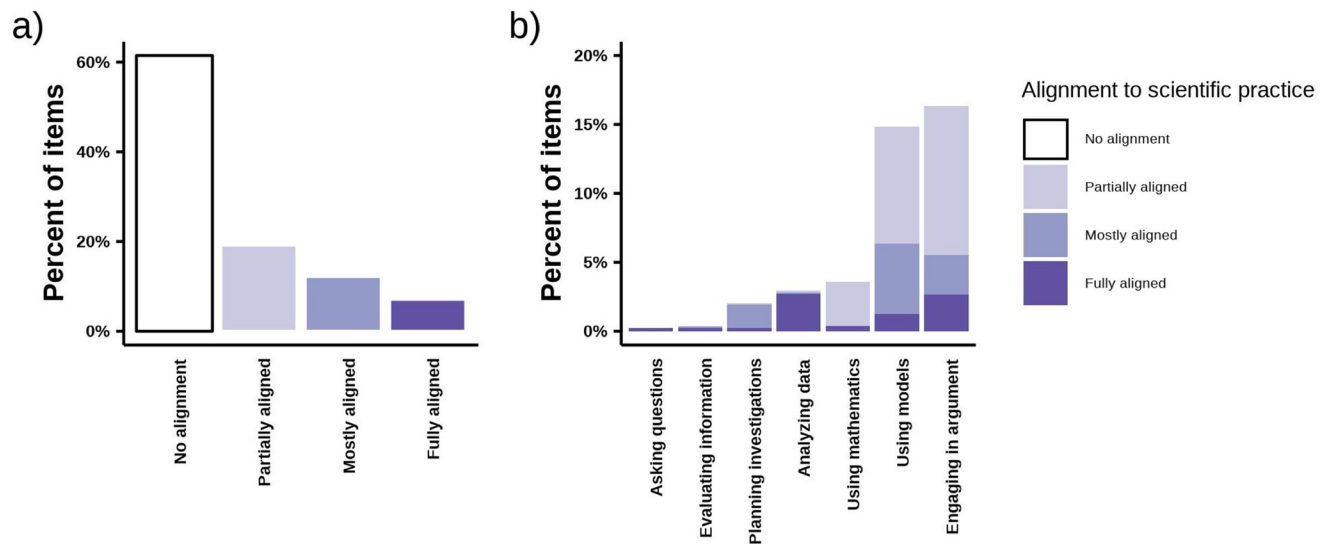

**Fig 6. Alignment of biology exam items to 3D-LAP criteria for scientific practices.** Percent of items is calculated out of the entire item pool ( $n = 4337$ ). a) The highest level of alignment to any scientific practice. b) The highest level of alignment to each scientific practice, so one item may be represented in multiple columns.

<https://doi.org/10.1371/journal.pone.0312252.g006>

The occurrence of partial alignment was not evenly distributed across scientific practices (Fig 6b). “Engaging in Argument,” “Using Models,” and “Using Mathematics” were the practices most likely to reach partial alignment, likely reflecting the low bar for partial alignment, which could be reached by giving students a scientific representation or claim. Meanwhile, “Using Models,” “Engaging in Argument,” and “Planning Investigations” had a relatively high incidence of items that mostly aligned but likely lacked a reasoning or justification component. When instructors had exam items that involved data analysis, they often fully met the associated scientific practice of “Analyzing and Interpreting Data.”

Considering exams as a whole enabled us to see the extent to which instructors incorporated aspects of scientific practices (Fig 7). While most instructors had a relatively low percent of exam points from items that fully align, many instructors also had points from items that mostly or partially meet the criteria for a scientific practice. However, there was considerable variation across instructors, with the percent of exam points partially or mostly aligned to scientific practices ranging from 0–48% and 0–83%, respectively. We further delineated this variation by describing a few representative exams (Fig 7 marked “A,” “B,” “C,” and “D”).

Exam A consisted entirely of multiple-choice items and the majority of those items tested conceptual knowledge and understanding, with an emphasis on definitions. This exam included a few items that partially aligned with the scientific practice of “Developing and Using Models,” but these items only tasked students with identifying common chemical and cellular structures from familiar models and did not ask students to extend their understanding by constructing explanations, making predictions, or engaging in reasoning about the model.

We see more novel contexts presented in Exam B, which contained non-canonical models of food webs and phylogenetic trees. Exam B did not have any items fully aligned to a scientific practice, a limitation of its entirely selected-response format that did not elicit explicit evidence of student reasoning. The greater emphasis on engaging students in novel models meant that over half of the exam points were at least partially aligned to a practice.



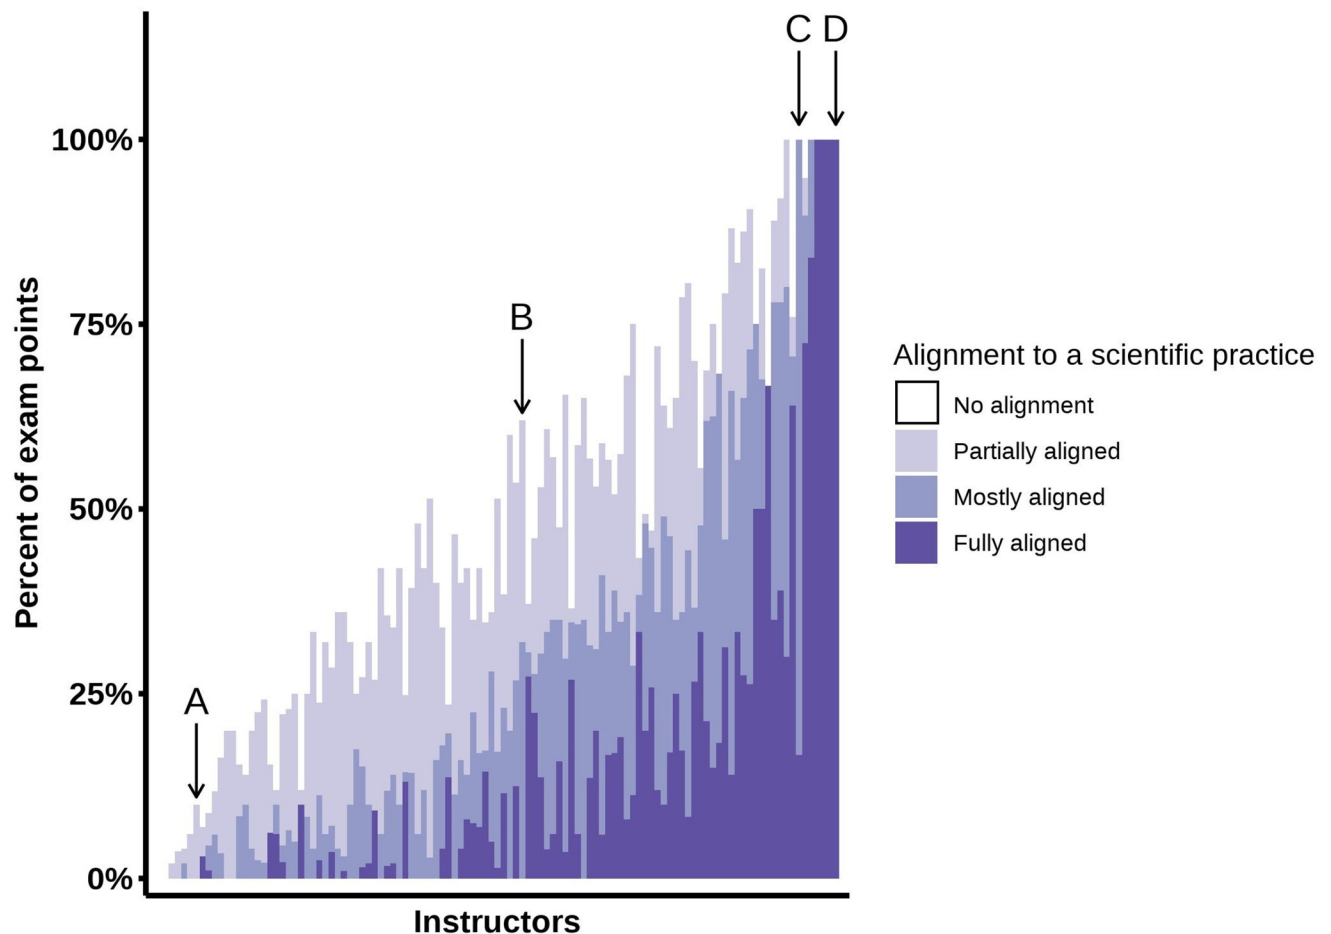

**Fig 7. Instructor alignment of biology exams to 3D-LAP criteria for scientific practices.** The point value of items at their highest level of scientific practice alignment were summed and divided by the total point value of all the exam items. To order the instructors in this graph, the highest level of scientific practice alignment for each item was recoded into a numerical scale (0 = No alignment; 0.33 = Partially aligned; 0.66 = Mostly aligned; 1 = Fully aligned) and multiplied by the normalized point value of the item and then summed for each instructor. Instructors are ordered from left to right based on increases in this summed value.

<https://doi.org/10.1371/journal.pone.0312252.g007>

The importance of novel scenarios to engage students in scientific practices was again illustrated in Exam C. This exam exclusively used clusters of constructed-response items that had important elements of scientific practices, such as making calculations based on data, but these items did not connect the scientific practices back to the underlying biological phenomenon. While the knowledge and ability to perform calculations is important to biology, the scientific practice “Using Mathematics” is only fully achieved when students can interpret their calculation and demonstrate that they understand what their calculation means in the context of a scientific phenomenon.

Exam D was similarly composed of clusters of constructed-response items and was an entirely three-dimensional exam. This exam included items with models and data adapted from published scientific papers, and what distinguished this exam was its emphasis on engaging students in the process of scientific reasoning. Students were not only asked to perform calculations and interpret figures, but they were also asked to describe their logic and use their understanding of crosscutting concepts and core ideas to defend their answers. The three-

dimensional items did not ask facts *about* science—they asked students to engage in the process of *doing* science.

## Discussion

Building on our conceptual framework (Fig 3), we sought to identify factors in the undergraduate biology education system associated with the incorporation of three-dimensional learning in courses, with a focus on introductory biology exams. We tested a variety of factors from across different levels and found a few factors significantly associated with three-dimensional exam alignment. Here, we propose potential explanations and implications for salient findings, and we reflect on how instructors might further achieve three-dimensional learning.

### A need for increased dissemination of the three-dimensional framework

Based on our conceptual framework, we hypothesized that *macro*-level national calls and educational frameworks have the potential to influence the content on undergraduate biology exams. We found little statistical evidence to support this hypothesis. Out of three documents—the 3D-LAP, *Vision and Change*, and Bloom’s Taxonomy—only self-reported use of Bloom’s Taxonomy was significantly associated with three-dimensional assessment. Bloom’s Taxonomy [42, 70] has been widely incorporated in undergraduate biology education research and professional development [44, 45, 47, 63, 77–83], and most instructors in our sample responded that they have used Bloom’s Taxonomy to some degree when developing their assessments (Fig 4). We suspect that instructors who intentionally targeted higher-order cognitive skills from Bloom’s Taxonomy in their assessments unintentionally met three-dimensional criteria. Instructors aiming to assess higher-order cognitive skills such as “analyze,” “evaluate,” or “create” may have also met the assessment criteria for scientific practices such as “Analyzing and Interpreting Data,” “Evaluating Information,” or “Constructing Explanations and Engaging in Argument from Evidence,” which contain the same or similar verbs. Scientific practices are rarely assessed apart from the other dimensions [35], so if an instructor met a scientific practice criteria, with or without intention, they likely also met the criteria for all three-dimensions.

Interestingly, use of *Vision and Change* and the 3D-LAP were not associated with three-dimensional assessment. A prominent movement within the biology education community, *Vision and Change* presents five core concepts and six core competencies to guide undergraduate biology courses [4]. While many instructors reported familiarity with this document (S1 Fig), the lack of connection with three-dimensional assessment may reflect a disconnect between the *macro*-level recommendations from the initial *Vision and Change* report and the *micro*-level curriculum decisions made by instructors. The 3D-LAP instrument has been used for research purposes and with smaller instructional learning communities, and our survey indicated that most biology instructors were not using this framework for assessment design.

Given these associations between educational documents and assessment practices, we speculate that targeted professional development incorporating the three-dimensional framework in course design and assessment may provide a necessary and practical entry point for instructors. Professional development on how to implement the 3D-LAP [21] and the associated Three-Dimensional Learning Observation Protocol (3D-LOP) [23] may help drive instruction and assessment to integrate scientific practices, crosscutting concepts, and disciplinary core ideas in a manner consistent with national calls. Furthermore, in contrast to Bloom’s Taxonomy, the three-dimensional framework provides additional guidance on how each dimension manifests within a science discipline, which can help instructors ensure that they are targeting and integrating the full range of practices, concepts, and core ideas.

### Three-dimensional assessment can occur at all institution types

All four institution types had instructors that found ways to incorporate three-dimensional items. This suggests that some degree of three-dimensional assessment can occur with small class sizes, such as those typical of Associate's and Baccalaureate colleges, and agrees with previous findings that three-dimensional assessment can occur at scale in high-enrollment courses, like those commonly seen in Master's and Doctoral universities [25, 36]. Our model retained institution type as a predictor, with a significant pairwise difference between Baccalaureate and Doctoral institutions. While this may reveal differences in underlying institutional environments, we interpret these results with caution and avoid making broad generalizations since our instructors represent only a select sample from these diverse institution classifications.

### Pedagogical resources, course attributes, and teaching practices not related to three-dimensional assessment

The final model excluded many other variables representing aspects of the education system. Among these, we found a consistent lack of connection between pedagogical resources at the *meso* and *micro* levels (e.g., departmental resources, DBER faculty, and assessment training) and three-dimensional assessment. This finding could stem from the lack of an explicit focus on the three-dimensional framework in these contexts. It also suggests that the presence of broadly-focused professional development programs may not be sufficient to initiate and sustain the implementation of national calls [84]. For example, instructors may struggle to see how three-dimensional learning fits within their existing departmental and course curricular expectations [85]. They may also be less likely to incorporate suggestions from professional development programs if they are unsure that these changes will be recognized in their departmental evaluation system [27, 83]. These findings point to the value of individual and instructional teams working together over a sustained period of time to achieve instructional change, a model that has specifically been employed to incorporate three-dimensional instruction [24, 25, 27].

A variety of *micro*-level course attributes were excluded from the model, which generally suggests that three-dimensional instruction can occur to similar degrees in a variety of courses. The equivalence of implementation across majors and non-majors courses attests to the importance of three-dimensional instruction for individuals pursuing science careers as well as those focused on non-science pathways [12]. In-person, hybrid, and online course were also similarly likely to incorporate three-dimensional assessment, suggesting that certain course formats are not disproportionately restrictive [38]. Finally, a course having a required laboratory component was not associated with the incorporation of three-dimensional assessment into the lecture exams. This finding that courses without required labs had similarly low incidence of three-dimensional assessment implies that the overall low incidence cannot be fully explained by courses partitioning scientific practices and broader three-dimensional learning into required lab courses.

We asked instructors to self-report at the *micro* level on their implementation of Scientific Teaching [82, 83, 86] using the Measurement Instrument for Scientific Teaching (MIST) [61]. We included the subcategories Active Learning Strategies, Data Analysis and Interpretation, and Experimental Design and Communication, which together closely mirror the three-dimensional framework. Our finding that MIST scores did not relate to three-dimensional assessment points to a potential misalignment between teaching and assessment practices. This misalignment may arise in more courses where science content and science practices are taught and assessed separately [87, 88]. Instructors who themselves were taught using this

approach may feel unprepared to integrate three-dimensional learning across their instruction and assessment in the way envisioned by national calls [89]. Future research should consider using the Three-Dimensional Learning Observation Protocol [23], which provides a means to make a more direct comparison between observed three-dimensional teaching practices and three-dimensional assessments.

### Item format reveals constraints to three-dimensional assessment

Only a small percent (2.8%) of selected-response (i.e., closed-ended) items were three-dimensional. On one hand, these items ( $n = 106$ ) provide support for the notion that multiple-choice and other selected-response formats *can* achieve the three-dimensional criteria [21, 90]. On the other hand, the infrequency of these items within the larger pool reflects that they likely require deliberate instructor development, and participants working to implement three-dimensional learning have recognized challenges with writing three-dimensional multiple-choice items [27]. It is difficult to write a selected-response item that touches on all three dimensions and elicits the reasoning needed to fulfill a scientific practice.

Constructed-response items appeared more amenable to assessing three-dimensional learning, evidenced by a higher percent (23%) of these items meeting the three-dimensional criteria. This suggests that the more flexible and generative nature of constructed-response items enables instructors to prompt students to integrate ideas across different dimensions as well as to articulate related reasoning. However, the time and resources needed to manually grade open-ended questions represents a major barrier to their implementation, particularly in large-enrollment courses.

Instructors face constraints on the amount of time they have for writing and grading questions [32], and instructors have noted that developing three-dimensional exams takes more time than standard assessments [27]. For closed-ended items, achieving three-dimensional assessment requires that instructors invest time in writing questions. Based on the items in our sample, we encourage instructors to find models and scenarios that lend themselves to asking about scientific practices and to address the highest criteria for a practice by including alternative reasoning as part of the answer options (see example question in Fig 2). Instructors may also benefit from closed-ended formats that enable multiple points of input from students, such as multiple-true-false questions [91–93] or two-tiered items (i.e., clustered items) that ask students to first answer “what” will happen in a biological scenario with a follow-up question to ask them to provide reasoning as to “how” that scenario might happen [94, 95]. For open-ended items, instructors likely need additional time or teaching assistants to help manage question grading. Efforts to use machine learning to grade open-ended items currently requires a large sample of responses beyond the scope of most courses [96, 97], but future work seems likely to make this approach increasingly plausible.

### Scientific practices as a target for three-dimensional alignment

To better understand additional avenues to three-dimensional alignment, we focused on the dimension least represented in our sample—scientific practices. Scientific practices may have been particularly low because of the 3D-LAP’s stringent coding scheme for this dimension, which requires explicit prompting for student reasoning. Such prompts encourage students to explain their logic behind scientific phenomena and provide evidence that they have appropriately engaged in a scientific practice [21, 37, 98, 99]. When an item does not explicitly ask students to provide reasoning, students may respond correctly without fully engaging in a scientific practice [37].

Our analysis of partial alignment to the scientific practices (Fig 6) revealed that most instructors had at least some components of scientific practices in their exams (Fig 7). A notable number of items were missing only the student reasoning component. This finding is not unique to biology, and previous work in chemistry has suggested that the reasoning component is often missing from assessment tasks [99, 100]. We view these items that were mostly aligned to scientific practices as promising starting places to build upon and bring into full alignment with the 3D-LAP criteria. However, not all items with some alignment to a scientific practice may be easily or directly brought into full alignment. Our sample contained many partially aligned items that only met surface-level criteria for the practices, such as including a visual representation of a biological phenomenon for students to label. These items are unlikely candidates for three-dimensional alignment. To reach three-dimensional alignment, students will need to be asked to provide evidence that they have reasoned with the depicted phenomenon and such evidence of reasoning is unlikely to be present in multiple-choice or fill-in-the-blank items in which students are only asked to identify or label parts of a familiar representation they have memorized.

### Limitations

Several limitations should be considered in the interpretation of our findings. First, we focused on exams, a common summative assessment strategy in undergraduate science courses [28–32, 101], but there are other types of summative assessments, such as projects, presentations, essays, and reports, that instructors may be using to assess scientific practices. Instructors may also be engaging students in scientific practices during formative assessments, such as in-class activities and homework assignments. Second, we focused this research on lower-division courses, which face a unique set of challenges (e.g., high enrollment, content coverage, variable student preparation) that may be barriers to the incorporation of three-dimensional instruction [32, 58, 102]. Our findings may not generalize to upper-division courses that do not feel these challenges to the same extent. Third, our survey did not specifically ask about professional development related to the three-dimensional framework, so we do not have positive evidence that targeted training will lead to implementation of the three-dimensional framework. We therefore highlight the need for the community to adopt training and support models with evidence for success [24, 25, 27] and to conduct ongoing research on how professional development can most effectively lead to implementation of three-dimensional learning and assessment.

### Conclusion

For decades, national reports [1, 4, 6, 7, 10] have called for contextualized science education that engages students in scientific practices. The three-dimensional framework [12] encapsulates many of the principles of these national calls and provides a lens for studying how national priorities are integrated across the undergraduate ology education system. Our work highlights the need for increased dissemination and adoption of the three-dimensional framework within the undergraduate biology education community. Furthermore, even with targeted training, we note that other aspects of the education system need to align with and support the implementation of the three-dimensional framework. Our research identifies the use of constructed-response items as a prominent variable with apparent ramifications. This finding speaks to ground-level challenges instructors face and reminds departments that deviation from current practice typically requires additional resources. Shifting towards three-dimensional instruction ultimately requires changes to curriculum, instruction, and assessment. For this reason, instructors may consider starting with making minor revisions to their current course materials. We view existing items as providing promising starting points for



future growth, and we encourage instructors to use the 3D-LAP to increase the depth of their scientific practices and to consult other publications on adapting assessment tasks to the three-dimensional framework [21, 90].

## Supporting information

### **S1 Data. De-identified data.**

(CSV)

### **S1 File. Additional details on how factors were collected, measured, and analyzed.**

(DOCX)

### **S2 File. Sample items coded for three-dimensional alignment.**

(DOCX)

### **S3 File. Coding for partial alignment to scientific practices.**

(DOCX)

### **S1 Fig. Distributions of responses to survey questions.**

(PDF)

### **S1 Table. Alignment of example item to three-dimensional framework.**

(DOCX)

### **S2 Table. Institutional Carnegie classifications and geographic regions.**

(DOCX)

### **S3 Table. Self-reported demographic information of undergraduate biology instructors.**

(DOCX)

### **S4 Table. Categories of lower-division biology courses included in the sample.**

(DOCX)

### **S5 Table. Descriptions of item types.**

(DOCX)

### **S6 Table. Tukey post hoc contrasts comparing between the probability of three-dimensional alignment based on institution type.**

(DOCX)

### **S7 Table. Item types of three-dimensional and non-three-dimensional items.**

(DOCX)

## Acknowledgments

We thank participating instructors and Sara Burbach for research assistance.

## Author Contributions

**Conceptualization:** Crystal Uminski, Brian A. Couch.

**Data curation:** Crystal Uminski.

**Formal analysis:** Crystal Uminski.

**Funding acquisition:** Crystal Uminski, Brian A. Couch.

**Investigation:** Crystal Uminski, Brian A. Couch.

**Methodology:** Crystal Uminski, Brian A. Couch.

**Project administration:** Brian A. Couch.

**Resources:** Brian A. Couch.

**Software:** Crystal Uminski.

**Supervision:** Brian A. Couch.

**Validation:** Crystal Uminski, Brian A. Couch.

**Visualization:** Crystal Uminski.

**Writing – original draft:** Crystal Uminski, Brian A. Couch.

**Writing – review & editing:** Crystal Uminski, Brian A. Couch.

## References

1. American Association for the Advancement of Science. Science for All Americans: A Project 2061 Report on Literacy Goals in Science, Mathematics, and Technology. American Association for the Advancement of Science; 1989.
2. American Association for the Advancement of Science. The Liberal Art of Science: Agenda for Action. Washington, D.C.: American Association for the Advancement of Science; 1990. [https://www.aaas.org/sites/default/files/the\\_liberal\\_art\\_of\\_science.pdf](https://www.aaas.org/sites/default/files/the_liberal_art_of_science.pdf)
3. American Association for the Advancement of Science. Benchmarks for Science Literacy. New York, NY: Oxford University Press; 1993.
4. American Association for the Advancement of Science. Vision and Change in Undergraduate Biology Education: A Call to Action. Washington, DC: AAAS; 2011. <https://live-visionandchange.pantheonsite.io/wp-content/uploads/2011/03/Revised-Vision-and-Change-Final-Report.pdf>
5. National Academies of Sciences, Engineering, and Medicine. Developing a National STEM Workforce Strategy: A Workshop Summary. Washington, D.C.: The National Academies Press; 2016.
6. National Academies of Sciences, Engineering, and Medicine. Call to Action for Science Education: Building Opportunity for the Future. Washington, D.C.: National Academies Press; 2021.
7. National Academies of Sciences, Engineering, and Medicine. Imagining the Future of Undergraduate STEM Education: Proceedings of a Virtual Symposium. Brenner K, Beatty A, Alper J, editors. Washington, D.C.: National Academies Press; 2022.
8. National Commission on Excellence in Education. A Nation At Risk: The Imperative For Educational Reform. Washington, D.C.: National Commission on Excellence in Education; 1983 Apr. <https://eric.ed.gov/?id=ED226006>
9. National Research Council. National Science Education Standards. Washington, D.C.: National Academies Press; 1996.
10. National Research Council. BIO2010: Transforming Undergraduate Education for Future Research Biologists. Washington, D.C.: National Academies Press; 2003.
11. National Research Council. Rising Above the Gathering Storm: Energizing and Employing America for a Brighter Economic Future. Washington, D.C.: National Academies Press; 2007.
12. National Research Council. A Framework for K-12 Science Education: Practices, Crosscutting Concepts, and Core Ideas. Washington, D.C.: National Academies Press; 2012.
13. National Research Council. Inquiry and the National Science Education Standards: A Guide for Teaching and Learning. Olson S, Loucks-Horsley S, editors. Washington, D.C.: National Academies Press; 2000.
14. Hardy I, Campbell T. Developing and supporting the Next Generation Science Standards: The role of policy entrepreneurs. *Sci Educ*. 2020; 104: 479–499. <https://doi.org/10.1002/sce.21566>
15. U.S. Department of Education, Institute of Education Sciences, National Center for Education Statistics, National Assessment of Educational Progress. NAEP Report Card: 2019 NAEP Science Assessment. U.S. Department of Education; 2019. [https://www.nationsreportcard.gov/science/supporting\\_files/2019\\_infographic\\_science.pdf](https://www.nationsreportcard.gov/science/supporting_files/2019_infographic_science.pdf)
16. National Academies of Sciences, Engineering, and Medicine. Barriers and Opportunities for 2-Year and 4-Year STEM Degrees: Systemic Change to Support Students' Diverse Pathways. Malcom S, Feder M, editors. Washington, D.C.: National Academies Press; 2016.

17. American Association for the Advancement of Science. Atlas of Science Literacy. Washington, DC: American Association for the Advancement of Science: National Science Teachers Association; 2001.
18. American Association for the Advancement of Science. Atlas of Science Literacy. Washington, DC: American Association for the Advancement of Science; 2007.
19. National Assessment of Educational Progress. Science Framework for the 2009 National Assessment of Educational Progress. Washington, DC: National Assessment Governing Board; 2008. <https://www.nagb.gov/content/dam/nagb/en/documents/publications/frameworks/science/2009-science-framework.pdf>
20. College Board. Science College Board Standards for College Success. 2009. <https://secure-media.collegeboard.org/apc/cbscs-science-standards-2009.pdf>
21. Lavery JT, Underwood SM, Matz RL, Posey LA, Carmel JH, Caballero MD, et al. Characterizing college science assessments: The Three-Dimensional Learning Assessment Protocol. PLOS ONE. 2016; 11: e0162333. <https://doi.org/10.1371/journal.pone.0162333> PMID: 27606671
22. NGSS Lead States. Next Generation Science Standards: For States, By States. Washington, DC: The National Academies Press; 2013.
23. Bain K, Bender L, Bergeron P, Caballero MD, Carmel JH, Duffy EM, et al. Characterizing college science instruction: The Three-Dimensional Learning Observation Protocol. PLOS ONE. 2020; 15: e0234640. <https://doi.org/10.1371/journal.pone.0234640> PMID: 32544166
24. Cooper MM, Caballero MD, Ebert-May D, Fata-Hartley CL, Jardeleza SE, Krajcik JS, et al. Challenge faculty to transform STEM learning. Science. 2015; 350: 281–282. <https://doi.org/10.1126/science.aab0933> PMID: 26472897
25. Matz RL, Fata-Hartley CL, Posey LA, Lavery JT, Underwood SM, Carmel JH, et al. Evaluating the extent of a large-scale transformation in gateway science courses. Sci Adv. 2018; 4: eaau0554. <https://doi.org/10.1126/sciadv.aau0554> PMID: 30397646
26. Radloff J, Capobianco B, Weller J, Rebello S, Eichinger D, Erk K. Aligning undergraduate science curricula with three-dimensional learning. J Coll Sci Teach. 2022; 52: 35–42.
27. Nelson PC, Matz RL, Bain K, Fata-Hartley CL, Cooper MM. Characterizing faculty motivation to implement three-dimensional learning. Discip Interdiscip Sci Educ Res. 2023; 5. <https://doi.org/10.1186/s43031-023-00079-0>
28. Gibbons RE, Reed JJ, Srinivasan S, Murphy KL, Raker JR. Assessment tools in context: Results from a national survey of postsecondary chemistry faculty. J Chem Educ. 2022; 99: 2843–2852. <https://doi.org/10.1021/acs.jchemed.2c00269>
29. Goubeaud K. How is science learning assessed at the postsecondary level? Assessment and grading practices in college biology, chemistry and physics. J Sci Educ Technol. 2010; 19: 237–245. <https://doi.org/10.1007/s10956-009-9196-9>
30. Hurtado S, Eagan K, Pryor, Whang H, Tran S. Undergraduate teaching faculty: The 2010–2011 HERI Faculty Survey. Los Angeles: Higher Education Research Institute, UCLA; 2012. <https://www.heri.ucla.edu/monographs/HERI-FAC2011-Monograph-Expanded.pdf>
31. Stanger-Hall KF. Multiple-choice exams: An obstacle for higher-level thinking in introductory science classes. CBE—Life Sci Educ. 2012; 11: 294–306. <https://doi.org/10.1187/cbe.11-11-0100> PMID: 22949426
32. Wright CD, Huang A, Cooper K, Brownell S. Exploring differences in decisions about exams among instructors of the same introductory biology course. Int J Scholarsh Teach Learn. 2018; 12. <https://doi.org/10.20429/ijstl.2018.120214>
33. Scouller K. The influence of assessment method on students' learning approaches: Multiple choice question examination versus assignment essay. High Educ. 1998; 35: 453–472. <https://doi.org/10.1023/A:1003196224280>
34. Wiggins GP, McTighe J. Understanding by Design. Alexandria, VA: Association for Supervision and Curriculum Development; 2005.
35. Uminski C, Burbach SM, Couch BA. Undergraduate biology lecture courses predominantly test facts about science rather than scientific practices. CBE—Life Sci Educ. 2024; 23: ar19. <https://doi.org/10.1187/cbe.23-12-0244> PMID: 38640405
36. Stowe RL, Charlott LJ, Ralph VR, Becker NM, Cooper MM. You are what you assess: The case for emphasizing chemistry on chemistry assessments. J Chem Educ. 2021; [acs.jchemed.1c00532](https://doi.org/10.1021/acs.jchemed.1c00532). <https://doi.org/10.1021/acs.jchemed.1c00532>
37. Stowe RL, Cooper MM. Practicing what we preach: Assessing “critical thinking” in organic chemistry. J Chem Educ. 2017; 94: 1852–1859. <https://doi.org/10.1021/acs.jchemed.7b00335>

38. Stowe RL, Esselman BJ, Ralph VR, Ellison AJ, Martell JD, DeGlopper KS, et al. Impact of maintaining assessment emphasis on three-dimensional learning as organic chemistry moved online. *J Chem Educ*. 2020; 97: 2408–2420. <https://doi.org/10.1021/acs.jchemed.0c00757>
39. Brownell SE, Freeman S, Wenderoth MP, Crowe AJ. BioCore Guide: A tool for interpreting the core concepts of Vision and Change for biology majors. *CBE—Life Sci Educ*. 2014; 13: 200–211. <https://doi.org/10.1187/cbe.13-12-0233> PMID: 26086653
40. Kozma RB, editor. *ICT and Educational Change: A Global Phenomenon. Technology, Innovation, and Educational Change: A Global Perspective*. Eugene, OR: International Society for Technology in Education; 2003. pp. 1–18.
41. Fulmer GW, Lee ICH, Tan KHK. Multi-level model of contextual factors and teachers' assessment practices: an integrative review of research. *Assess Educ Princ Policy Pract*. 2015; 22: 475–494. <https://doi.org/10.1080/0969594X.2015.1017445>
42. Bloom BS, Krathwohl DR, Masia BB. *Taxonomy of Educational Objectives: The Classification of Educational Goals*. New York, NY: McKay; 1956.
43. Pring R. Bloom's taxonomy: A philosophical critique. In: Norris N, editor. *Curriculum and the Teacher: 35 years of the Cambridge Journal of Education*. New York, NY: Routledge; 2008. p. 7.
44. Crowe A, Dirks C, Wenderoth MP. Biology in Bloom: Implementing Bloom's Taxonomy to enhance student learning in biology. *CBE—Life Sci Educ*. 2008; 7: 368–381. <https://doi.org/10.1187/cbe.08-05-0024> PMID: 19047424
45. Semsar K, Casagrand J. Bloom's dichotomous key: a new tool for evaluating the cognitive difficulty of assessments. *Adv Physiol Educ*. 2017; 41: 170–177. <https://doi.org/10.1152/advan.00101.2016> PMID: 28235756
46. Thompson AR, O'Loughlin VD. The Blooming Anatomy Tool (BAT): A discipline-specific rubric for utilizing Bloom's taxonomy in the design and evaluation of assessments in the anatomical sciences. *Anat Sci Educ*. 2015; 8: 493–501. <https://doi.org/10.1002/ase.1507> PMID: 25516150
47. Arneson JB, Offerdahl EG. Visual literacy in Bloom: Using Bloom's Taxonomy to support visual learning skills. *CBE—Life Sci Educ*. 2018; 17: ar7. <https://doi.org/10.1187/cbe.17-08-0178> PMID: 29351910
48. Indiana University Center for Postsecondary Research. *The Carnegie Classification of Institutions of Higher Education*. 2021 edition. Bloomington, IN; 2021.
49. Smith MK, Vinson EL, Smith JA, Lewin JD, Stetzer MR. A campus-wide study of STEM courses: New perspectives on teaching practices and perceptions. *CBE—Life Sci Educ*. 2014; 13: 624–635. <https://doi.org/10.1187/cbe.14-06-0108> PMID: 25452485
50. Sunal DW, Hodges J, Sunal CS, Whitaker KW, Freeman LM, Edwards L, et al. Teaching science in higher education: Faculty professional development and barriers to change. *Sch Sci Math*. 2001; 101: 246–257. <https://doi.org/10.1111/j.1949-8594.2001.tb18027.x>
51. Biswas S, Benabentos R, Brewé E, Potvin G, Edward J, Kravec M, et al. Institutionalizing evidence-based STEM reform through faculty professional development and support structures. *Int J STEM Educ*. 2022; 9: 36. <https://doi.org/10.1186/s40594-022-00353-z> PMID: 35578717
52. National Research Council. *Discipline-Based Education Research: Understanding and Improving Learning in Undergraduate Science and Engineering*. Washington, D.C.: National Academies Press; 2012. p. 13362.
53. Wieman C, Perkins K, Gilbert S. Transforming science education at large research universities: *Change Mag High Learn*. 2010; 42: 6–14.
54. Austin AE. Promoting evidence-based change in undergraduate science education: A paper commissioned by the National Academies National Research Council. 2011 [cited 21 Mar 2023]. [https://sites.nationalacademies.org/cs/groups/dbassesite/documents/webpage/dbasse\\_072578.pdf](https://sites.nationalacademies.org/cs/groups/dbassesite/documents/webpage/dbasse_072578.pdf)
55. Stepan JI, Shiflett M, Yager RE, Saigo BW. *Professional Development Standards. College Pathways to the Science Education Standards*. Arlington, Virginia: National Science Teachers Association Press; 2001. pp. 25–56.
56. Couch BA, Prevost LB, Stains M, Whitt B, Marcy AE, Apkarian N, et al. Examining whether and how instructional coordination occurs within introductory undergraduate STEM courses. *Front Educ*. 2023; 8. Available: <https://www.frontiersin.org/articles/10.3389/educ.2023.1156781>
57. Lane AK, Earl B, Feola S, Lewis JE, McAlpin JD, Mertens K, et al. Context and content of teaching conversations: Exploring how to promote sharing of innovative teaching knowledge between science faculty. *Int J STEM Educ*. 2022; 9: 53. <https://doi.org/10.1186/s40594-022-00369-5>
58. Ebert-May D, Derting TL, Hodder J, Momsen JL, Long TM, Jardeleza SE. What we say is not what we do: Effective evaluation of faculty professional development programs. *BioScience*. 2011; 61: 550–558. <https://doi.org/10.1525/bio.2011.61.7.9>

59. Pelletreau KN, Knight JK, Lemons PP, McCourt JS, Merrill JE, Nehm RH, et al. A faculty professional development model that improves student learning, encourages active-learning instructional practices, and works for faculty at multiple institutions. *CBE—Life Sci Educ.* 2018; 17: es5. <https://doi.org/10.1187/cbe.17-12-0260> PMID: 29749849
60. Durham MF, Knight JK, Bremers EK, DeFreeze JD, Paine AR, Couch BA. Student, instructor, and observer agreement regarding frequencies of scientific teaching practices using the Measurement Instrument for Scientific Teaching-Observable (MISTO). *Int J STEM Educ.* 2018; 5: 31. <https://doi.org/10.1186/s40594-018-0128-1> PMID: 30631721
61. Durham MF, Knight JK, Couch BA. Measurement Instrument for Scientific Teaching (MIST): A tool to measure the frequencies of research-based reaching practices in undergraduate science courses. *CBE—Life Sci Educ.* 2017; 16. <https://doi.org/10.1187/cbe.17-02-0033> PMID: 29196428
62. Ballen CJ, Aguilon SM, Awwad A, Bjune AE, Challou D, Drake AG, et al. Smaller classes promote equitable student participation in STEM. *BioScience.* 2019; 69: 669–680. <https://doi.org/10.1093/biosci/biz069>
63. Momsen JL, Long TM, Wyse SA, Ebert-May D. Just the facts? Introductory undergraduate biology courses focus on low-level cognitive skills. *CBE—Life Sci Educ.* 2010; 9: 435–440. <https://doi.org/10.1187/cbe.10-01-0001> PMID: 21123690
64. Knight JK, Smith MK. Different but equal? How nonmajors and majors approach and learn genetics. *CBE—Life Sci Educ.* 2010; 9: 34–44. <https://doi.org/10.1187/cbe.09-07-0047> PMID: 20194806
65. The Effect of a Paired Lab on Course Completion and Grades in Nonmajors Introductory Biology | CBE—Life Sciences Education. [cited 22 Aug 2024]. <https://www.lifescied.org/doi/full/10.1187/cbe.20-03-0041>
66. Hubbard JK, Potts MA, Couch BA. How question types reveal student thinking: An experimental comparison of multiple-true-false and free-response formats. Perez KE, editor. *CBE—Life Sci Educ.* 2017; 16: ar26. <https://doi.org/10.1187/cbe.16-12-0339> PMID: 28450446
67. Furtak EM. Confronting dilemmas posed by three-dimensional classroom assessment: Introduction to a virtual issue of Science Education. *Sci Educ.* 2017; 101: 854–867. <https://doi.org/10.1002/sce.21283>
68. National Research Council. Developing Assessments for the Next Generation Science Standards. Washington, D.C.: National Academies Press; 2014. p. 18409.
69. Siebert ED, McIntosh WJ, editors. College Pathways to the Science Education Standards. Arlington, Virginia: NSTA Press, 1840 Wilson Blvd; 2001.
70. Anderson LW, Krathwohl DR, Bloom BS. A Taxonomy for Learning, Teaching, and Assessing: A Revision of Bloom's Taxonomy of Educational Objectives. New York, NY: Longman; 2001.
71. Greenwood M. AICs for model selection. Intermediate Statistics with R. Montana State University: LibreTexts Project; 2023. [https://batch.libretexts.org/print/url=https://stats.libretexts.org/Bookshelves/Advanced\\_Statistics/Intermediate\\_Statistics\\_with\\_R\\_\(Greenwood\)/08%3A\\_Multiple\\_linear\\_regression/8.13%3A\\_AICs\\_for\\_model\\_selection.pdf](https://batch.libretexts.org/print/url=https://stats.libretexts.org/Bookshelves/Advanced_Statistics/Intermediate_Statistics_with_R_(Greenwood)/08%3A_Multiple_linear_regression/8.13%3A_AICs_for_model_selection.pdf)
72. R Core Team. R: A language and environment for statistical computing. Vienna, Austria: R Foundation for Statistical Computing; 2023. <https://www.R-project.org/>
73. Wickham H, Averick M, Bryan J, Chang W, D'Agostino McGowan L, François R, et al. Welcome to the tidyverse. *J Open Source Softw.* 2019; 4: 1686. <https://doi.org/10.21105/joss.01686>
74. Bates D, Maechler M, Bolker B, Walker S. Fitting linear mixed-effects models using lme4. *J Stat Softw.* 2015; 67: 1–48. <https://doi.org/10.18637/jss.v067.i01>
75. Fox J, Weisberg S. An R Companion to Applied Regression. 3rd ed. Thousand Oaks, CA: Sage; 2019. <https://socialsciences.mcmaster.ca/jfox/Books/Companion/>
76. Hothorn T, Bretz F, Westfall P. Simultaneous inference in general parametric models. *Biom J.* 2008; 50: 346–363. <https://doi.org/10.1002/bimj.200810425> PMID: 18481363
77. Momsen JL, Offerdahl E, Kryjevskaja M, Montplaisir L, Anderson E, Grosz N. Using assessments to investigate and compare the nature of learning in undergraduate science courses. *CBE—Life Sci Educ.* 2013; 12: 239–249. <https://doi.org/10.1187/cbe.12-08-0130> PMID: 23737631
78. Larsen TM, Endo BH, Yee AT, Do T, Lo SM. Probing internal assumptions of the revised Bloom's Taxonomy. *CBE—Life Sci Educ.* 2022; 21: ar66. <https://doi.org/10.1187/cbe.20-08-0170> PMID: 36112622
79. Zheng AY, Lawhorn JK, Lumley T, Freeman S. Application of Bloom's Taxonomy debunks the "MCAT myth." *Science.* 2008; 319: 414–415. <https://doi.org/10.1126/science.1147852> PMID: 18218880
80. Lemons PP, Lemons JD. Questions for assessing higher-order cognitive skills: It's not just Bloom's. *CBE—Life Sci Educ.* 2013; 12: 47–58. <https://doi.org/10.1187/cbe.12-03-0024> PMID: 23463228
81. Freeman S, Haak D, Wenderoth MP. Increased course structure improves performance in introductory biology. *CBE—Life Sci Educ.* 2011; 10: 175–186. <https://doi.org/10.1187/cbe.10-08-0105> PMID: 21633066



82. Handelsman J, Miller S, Pfund C. *Scientific Teaching*. Macmillan; 2007.
83. Couch BA, Brown TL, Schelpat TJ, Graham MJ, Knight JK. Scientific Teaching: Defining a taxonomy of observable practices. *CBE—Life Sci Educ*. 2015; 14: ar9. <https://doi.org/10.1187/cbe.14-01-0002> PMID: 25713097
84. Derting TL, Ebert-May D, Henkel TP, Maher JM, Arnold B, Passmore HA. Assessing faculty professional development in STEM higher education: Sustainability of outcomes. *Sci Adv*. 2016; 2: e1501422. <https://doi.org/10.1126/sciadv.1501422> PMID: 27034985
85. Heredia SC. Exploring the role of coherence in science teachers' sensemaking of science-specific formative assessment in professional development. *Sci Educ*. 2020; 104: 581–604. <https://doi.org/10.1002/sce.21561>
86. Handelsman J, Ebert-May D, Beichner R, Bruns P, Chang A, DeHaan R, et al. *Scientific Teaching*. *Science*. 2004; 304: 521–522. <https://doi.org/10.1126/science.1096022> PMID: 15105480
87. Pellegrino JW. Proficiency in science: Assessment challenges and opportunities. *Science*. 2013; 340: 320–323. <https://doi.org/10.1126/science.1232065> PMID: 23599485
88. Pruitt SL. The Next Generation Science Standards: The features and challenges. *J Sci Teach Educ*. 2014; 25: 145–156. <https://doi.org/10.1007/s10972-014-9385-0>
89. Krajcik J. Three-dimensional instruction. *Sci Teach*. 2015; 50–52.
90. Underwood SM, Posey LA, Herrington DG, Carmel JH, Cooper MM. Adapting assessment tasks to support three-dimensional learning. *J Chem Educ*. 2018; 95: 207–217. <https://doi.org/10.1021/acs.jchemed.7b00645>
91. Couch BA, Wright CD, Freeman S, Knight JK, Semsar K, Smith MK, et al. GenBio-MAPS: A programmatic assessment to measure student understanding of Vision and Change core concepts across general biology programs. Coley J, editor. *CBE—Life Sci Educ*. 2019; 18: ar1. <https://doi.org/10.1187/cbe.18-07-0117> PMID: 30681904
92. Brassil CE, Couch BA. Multiple-true-false questions reveal more thoroughly the complexity of student thinking than multiple-choice questions: a Bayesian item response model comparison. *Int J STEM Educ*. 2019; 6: 16. <https://doi.org/10.1186/s40594-019-0169-0>
93. Couch BA, Hubbard JK, Brassil CE. Multiple-true-false questions reveal the limits of the multiple-choice format for detecting students with incomplete understandings. *BioScience*. 2018; 68: 455–463. <https://doi.org/10.1093/biosci/biy037>
94. Doherty JH, Cerchiara JA, Wenderoth MP. Undergraduate students' neurophysiological reasoning: what we learn from the attractive distractors students select. *Adv Physiol Educ*. 2023; 47: 222–236. <https://doi.org/10.1152/advan.00128.2022> PMID: 36759149
95. Cerchiara JA, Kim KJ, Meir E, Wenderoth MP, Doherty JH. A new assessment to monitor student performance in introductory neurophysiology: Electrochemical Gradients Assessment Device. *Adv Physiol Educ*. 2019; 43: 211–220. <https://doi.org/10.1152/advan.00209.2018> PMID: 31088158
96. Moharreri K, Ha M, Nehm RH. EvoGrader: an online formative assessment tool for automatically evaluating written evolutionary explanations. *Evol Educ Outreach*. 2014; 7: 15. <https://doi.org/10.1186/s12052-014-0015-2>
97. Nehm RH, Ha M, Mayfield E. Transforming biology assessment with machine learning: Automated scoring of written evolutionary explanations. *J Sci Educ Technol*. 2012; 21: 183–196. <https://doi.org/10.1007/s10956-011-9300-9>
98. Cooper MM, Stowe RL. Chemistry education research—From personal empiricism to evidence, theory, and informed practice. *Chem Rev*. 2018; 118: 6053–6087. <https://doi.org/10.1021/acs.chemrev.8b00020> PMID: 29893111
99. Lavery JT, Underwood SM, Matz RL, Posey LA, Carmel JH, Caballero MD, et al. Comment on “Analyzing the Role of Science Practices in ACS Exam Items.” *J Chem Educ*. 2017; 94: 673–674. <https://doi.org/10.1021/acs.jchemed.7b00170>
100. Reed JJ, Brandriet AR, Holme TA. Analyzing the role of science practices in ACS exam items. *J Chem Educ*. 2017; 94: 3–10. <https://doi.org/10.1021/acs.jchemed.6b00659>
101. Wright CD, Eddy SL, Wenderoth MP, Abshire E, Blankenbiller M, Brownell SE. Cognitive difficulty and format of exams predicts gender and socioeconomic gaps in exam performance of students in introductory biology courses. *CBE—Life Sci Educ*. 2016; 15: ar23. <https://doi.org/10.1187/cbe.15-12-0246> PMID: 27252299
102. Henderson C, Dancy MH. Barriers to the use of research-based instructional strategies: The influence of both individual and situational characteristics. *Phys Rev Spec Top—Phys Educ Res*. 2007; 3: 020102. <https://doi.org/10.1103/PhysRevSTPER.3.020102>
